# Supplementary material for: A 61% lighter cell culture dish to reduce plastic waste
Source: PLoS One. 2019 Apr 30;14(4):e0216251. doi: 10.1371/journal.pone.0216251 (PMC6490915; doi:10.1371/journal.pone.0216251)
Supplement: S1 Table — (XLSX) [file pone.0216251.s001.xlsx]

## Sheet: cell number
Cell number
Control	Control	Control	Prototype	Prototype	Prototype
collection1	collection2	collection3	collection1	collection2	collection3
3526000	2526000	3084000	2728000	3472000	3738000
2972000	2938000	3960000	2938000	3228000	3582000
2726000	3528000	2928000	2928000	3428000	3038000
3416000	2716000	3338000	3478000	3060000	3506000
3060000	3516000	3806000	3778000	3284000	3372000
2014000	3350000	3038000	3730000	3730000	3206000

## Sheet: % live cells
% live cells
Control	Control	Control	Prototype	Prototype	Prototype
collection1	collection2	collection3	collection1	collection2	collection3
92.8	94.3	97.8	95.82	96.14	97.06
95.49	97	97.42	97.75	98.57	98.16
96.77	99.04	98.09	96.52	98.07	97.43
97.78	98.38	98.32	90.51	98.56	95.89
97.12	97.5	98.21	97.51	98.66	97.69
98.41	98.33	98.88	97.27	96.68	97.57

## Sheet: cells per mm2
cells / mm2
Control 1	Control 2	Control 3	Prototype 1	Prototype 2	Prototype 3
539.07	1067.26	796.241	390.702	545.005	763.6
557.864	1517.31	1281.9	432.245	793.274	1361.03
647.873	766.568	649.852	1377.84	599.407	645.895
612.265	596.439	325.42	1209.69	534.125	403.561
556.874	552.918	543.027	1017.8	837.784	537.092
657.765	433.234	382.789	666.667	613.254	579.624
671.612	294.758	509.397	456.973	668.645	475.767
804.154	518.299	788.328	377.844	636.993	523.244
613.254	1151.34	1587.54	425.321	509.397	597.428
1207.72	448.071	729.97	512.364	870.425	617.211
528.19	1309.59	544.016	398.615	623.145	572.7
594.461	336.301	787.339	454.006	604.352	472.799
463.897	249.258	482.69	419.387	500.495	542.038
705.242	437.191	431.256	421.365	589.515	468.843
638.971	488.625	550.94	1129.57	543.027	474.777

## Sheet: weight
Weight
	1 Petri dish (g)		3 Petri dishes (g)		1 Prototype: 3 layers, outer shell and lid. (g)
1	17.29		51.87		19.88
2	17.31		51.93		20.51
3	16.96		50.88		19.15
4	17.29		51.87		20.8
5	16.96		50.88		19.71
6	17.04		51.12		19.72

## Sheet: volume
Volume
	1 Petri dish				3 petri dishes		1 Prototype
	Hight (cm)	Diameter (cm)	Volume (cm3)		Volume (cm3)		Hight (cm)	Diameter (cm)	Volume (cm3)
1	2.098	9.347	143.886		431.659		2.107	9.33	143.978
2	2.113	9.321	144.11		432.33		2.117	9.361	145.625
3	2.133	9.353	146.475		439.424		2.095	9.342	143.527
4	2.127	9.312	144.785		434.355		2.059	9.334	140.819
5	2.106	9.346	144.404		433.212		2.058	9.323	140.419
6	2.108	9.337	144.263		432.789		2.084	9.332	142.468
